# Supplementary material
Source: PubMed Central journal article supplement (PMC3687586)
Supplement: NIHMS422694-supplement-FigS1-S6_TableS1-S6.pdf [file NIHMS422694-supplement-FigS1-S6_TableS1-S6.pdf]

## **Supplemental Information for Delaney *et al.***

### **Supplemental Figure 1: Survival of long-lived strains following transient heat shock.**

(a) Long lived strains which showed significant ( $p < 0.05$ ) changes in relative growth inhibition compared to wild type BY4742 are shown. The control sensitive *msn2Δmsn4Δ* and *hac1Δ* strains are shown for comparison. Error bars are s.e.m. Data for all strains tested can be found in

#### **Supplemental Table 4.**

(b) Percent survival after heat shock is shown for wild type BY4742 and long lived strains *rpl20bΔ* and *afg3Δ* cells.

(c) Scatter plot comparing the percent change in replicative lifespan to percent change in survival for each long-lived mutant.

### **Supplemental Figure 2: Replicative lifespan curves of control strains sensitive to the tested stresses. Parentheses denote mean lifespan.**

**Supplemental Figure 3: Growth curves and lifespan curves of respiratory dead or deficient strains.** Parentheses denote mean lifespan, arrows indicate when the cultures shift to respiration.

### **Supplemental Figure 4: Unsuppressed growth of *afg3Δ*, *yta12Δ*, and *mrpl32Δ* and corresponding lifespan curves.**

(a) Pictures of tetrads resulting from *afg3Δ*, *yta12Δ*, and *mrpl32Δ* crosses.

(b) Lifespans of indicated strains. Parentheses denote mean lifespans.

(c) Patches of yeast grown at 30°C indicate that *rho<sup>0</sup>* cells can be complemented by *afg3Δ* mutants, indicating *afg3Δ* contains functional mtDNA

(d) Lifespans of indicated strains. Parentheses denote mean lifespans.

**Supplemental Figure 5: Cold incubation similarly impairs *afg3Δ* cell growth and longevity relative to *rpl20bΔ* cells**

Spot tests of indicated strains were performed by growing the strain for 24 hours in YPD at 30°C and then serially diluting the cultures 1:10 on the media indicated. Days of incubation are indicated by the number in the lower left corner of each picture. Lifespans were performed in a 15°C incubator on normal YEPD plates.

**Supplemental Figure 6: WT and *afg3Δ* cells do not perish after 24 hours in YPD medium**

(a) Colony forming viability assay after 24 hours of growth in YPD, 30°C.

(b) Cells incubated as in (a) were also tested for membrane integrity defects, of which less than 1% of WT or *afg3Δ* cells could stain with a vital dye (a heat shock positive control is also shown).

**Supplemental Table 1: Summary of long lived mutants' resistance profile: Tunicamycin**

**Supplemental Table 2: Summary of long lived mutants' resistance profile: Paraquat**

**Supplemental Table 3: Summary of long lived mutants' resistance profile: Heat shock**

**Supplemental Table 4: Summary of long lived mutants' resistance profile: MMS**

**Supplemental Table 5: Strain list**

**Supplemental Table 6: Lifespan statistics**

Figure S1

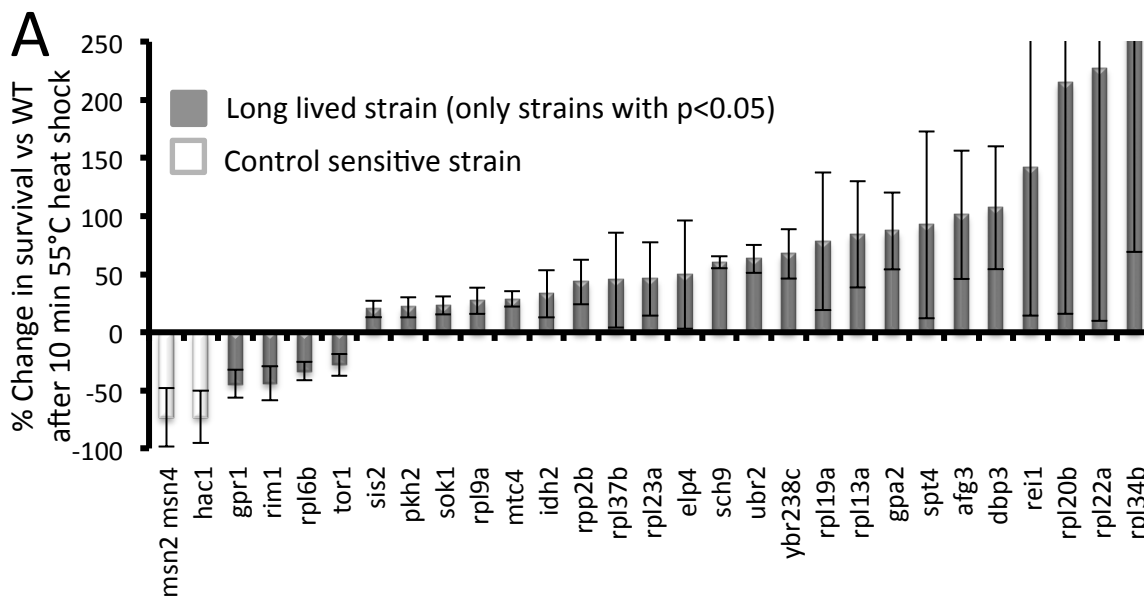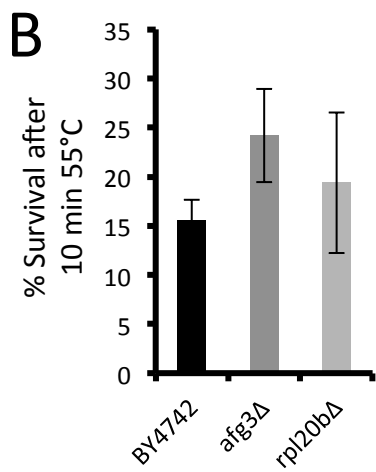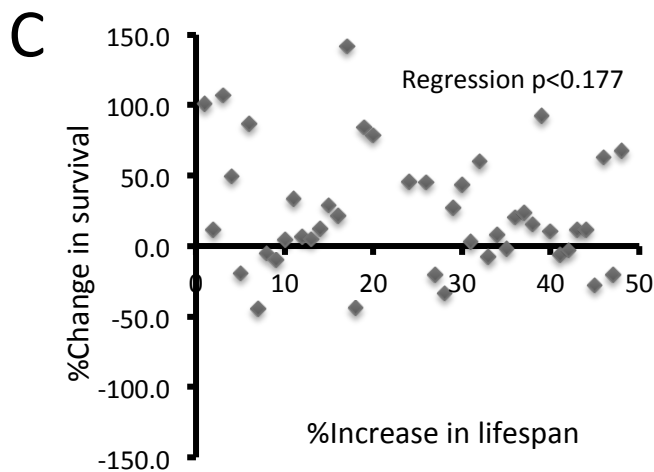

Figure S2

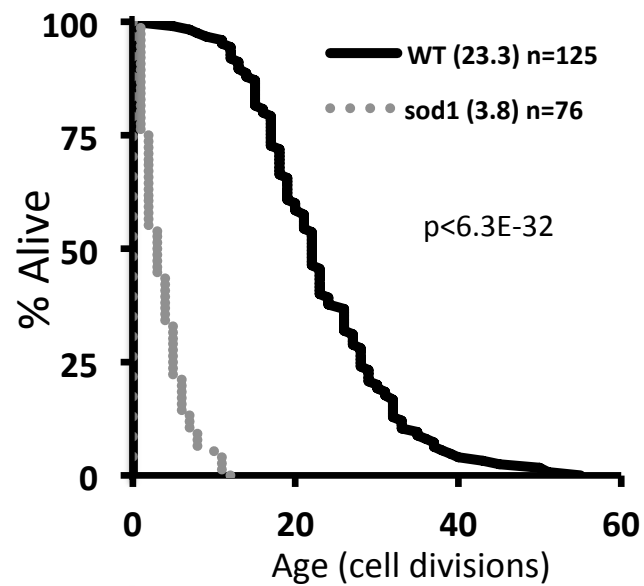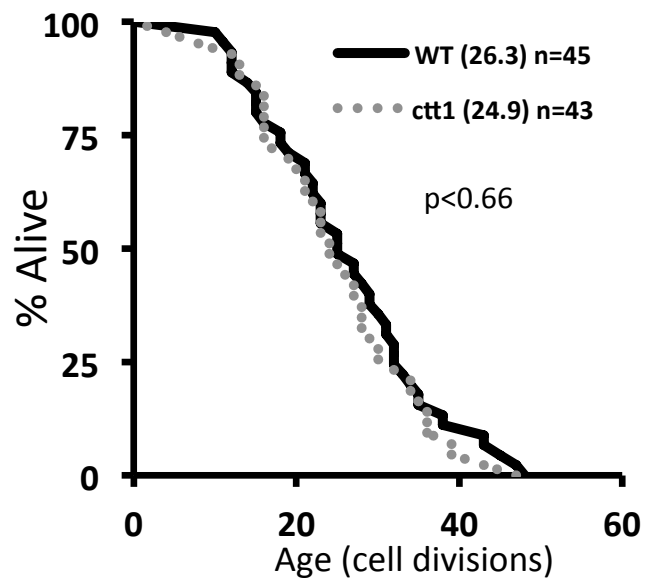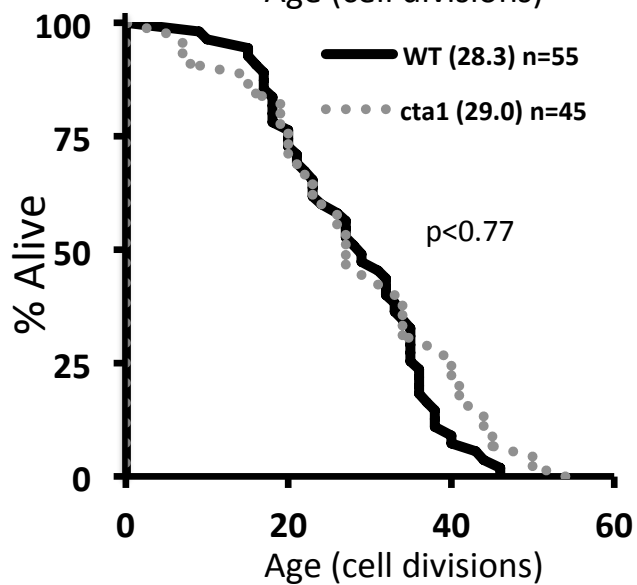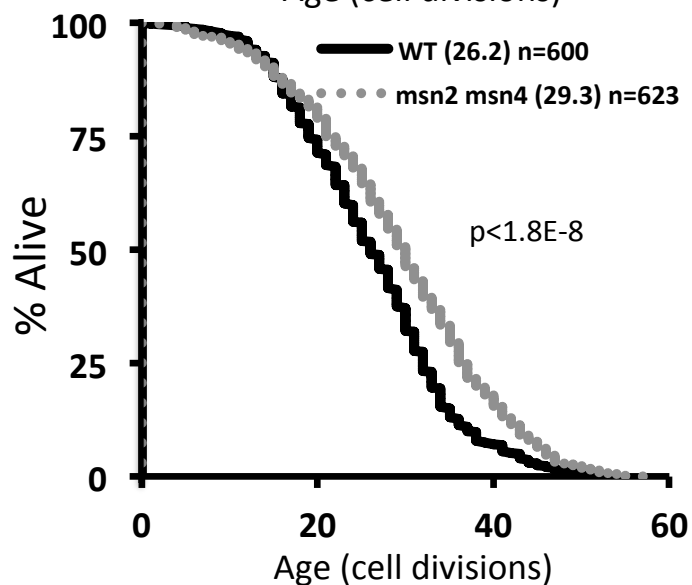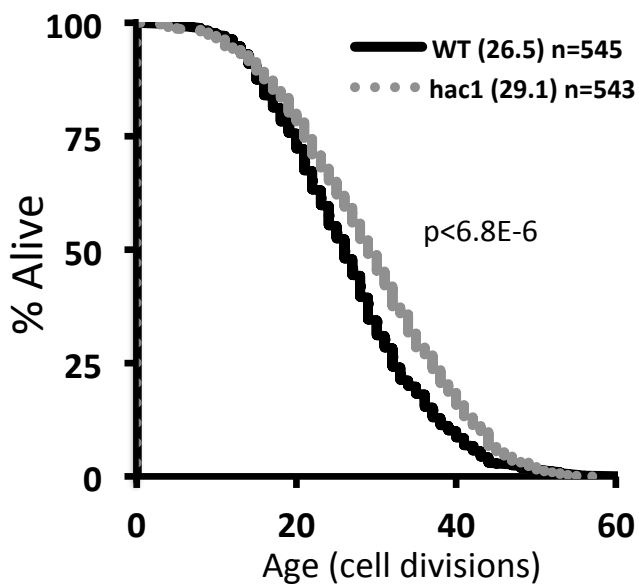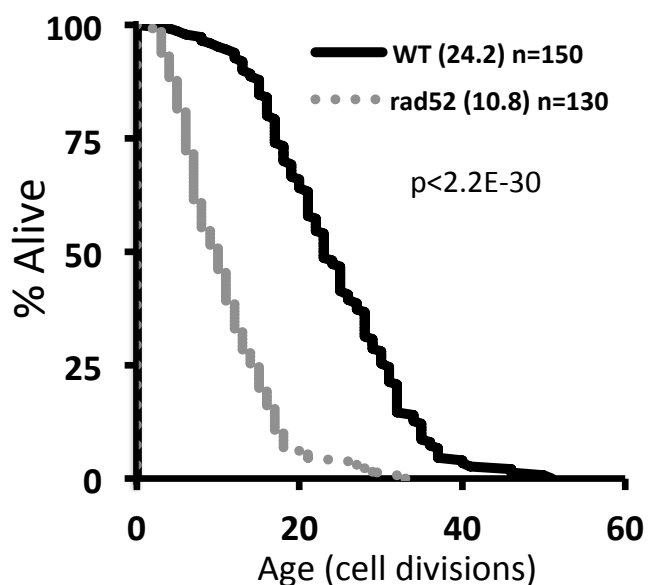

Figure S3

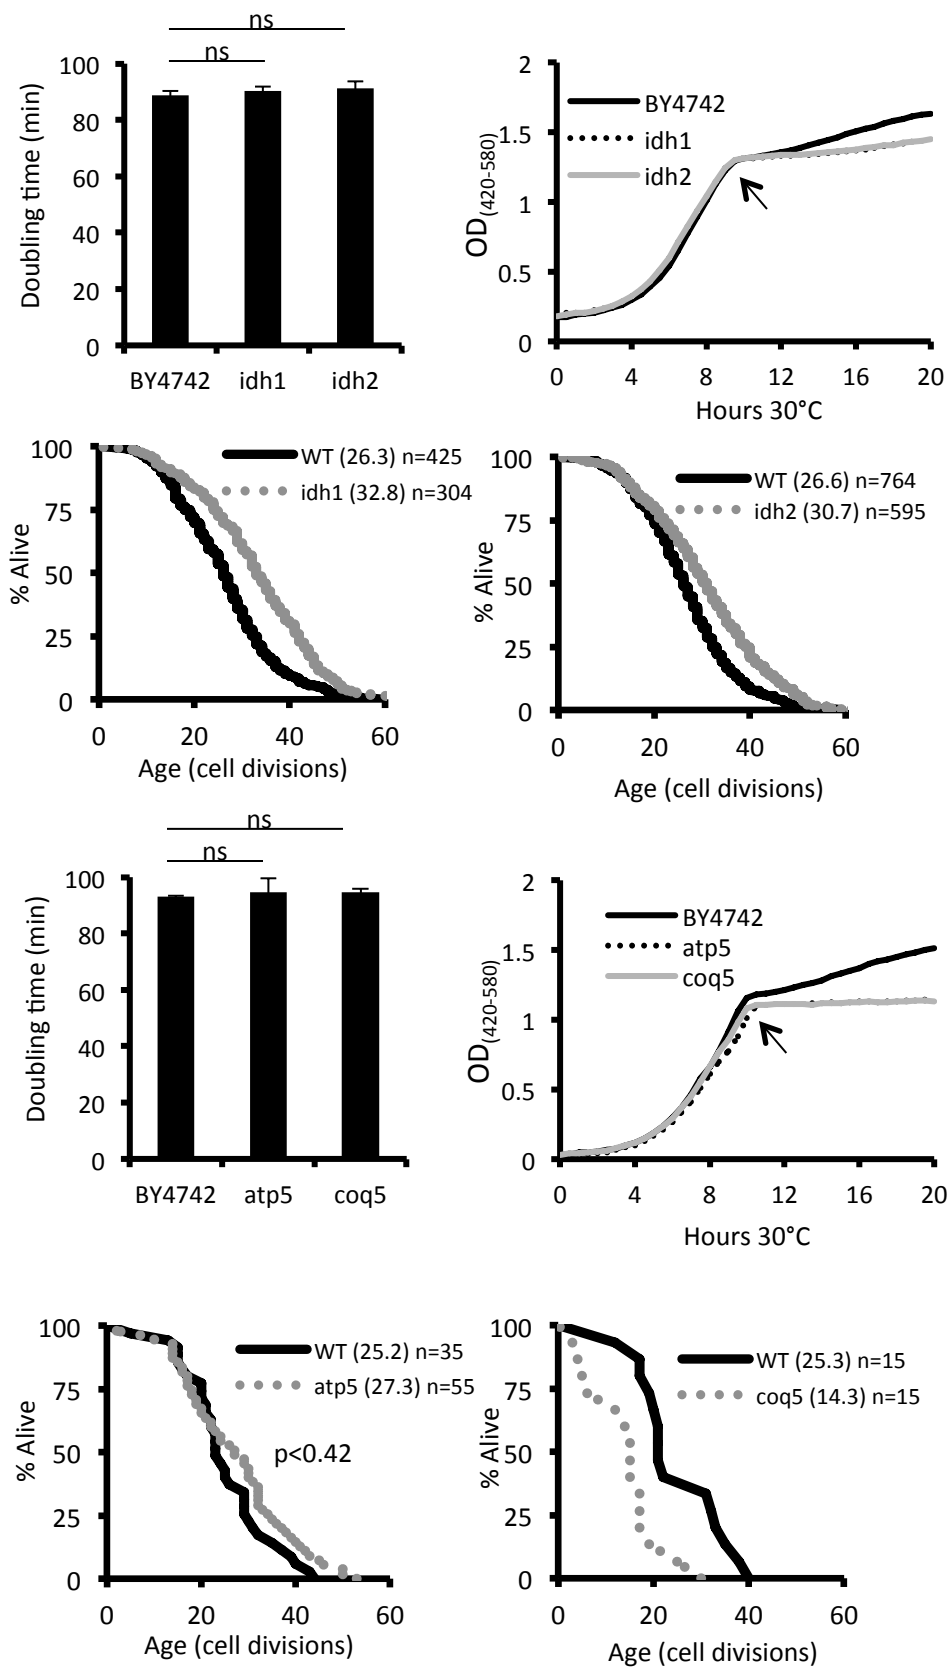

Figure S4

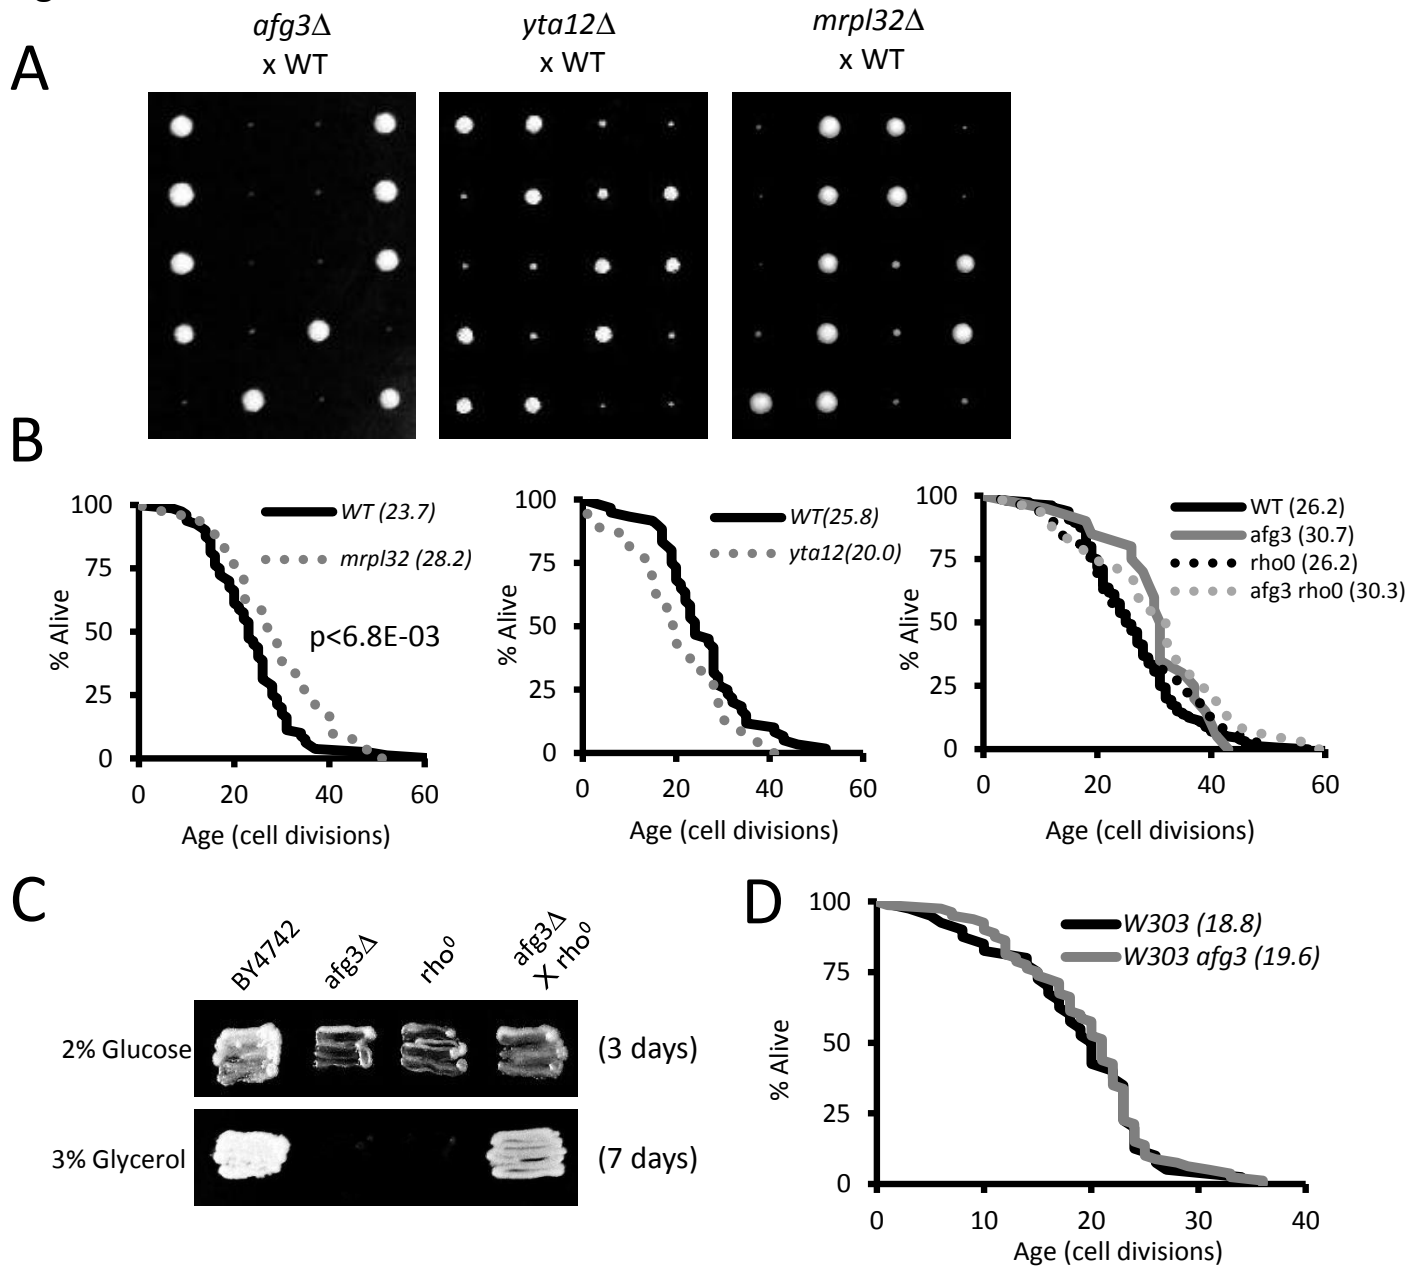

Figure S5

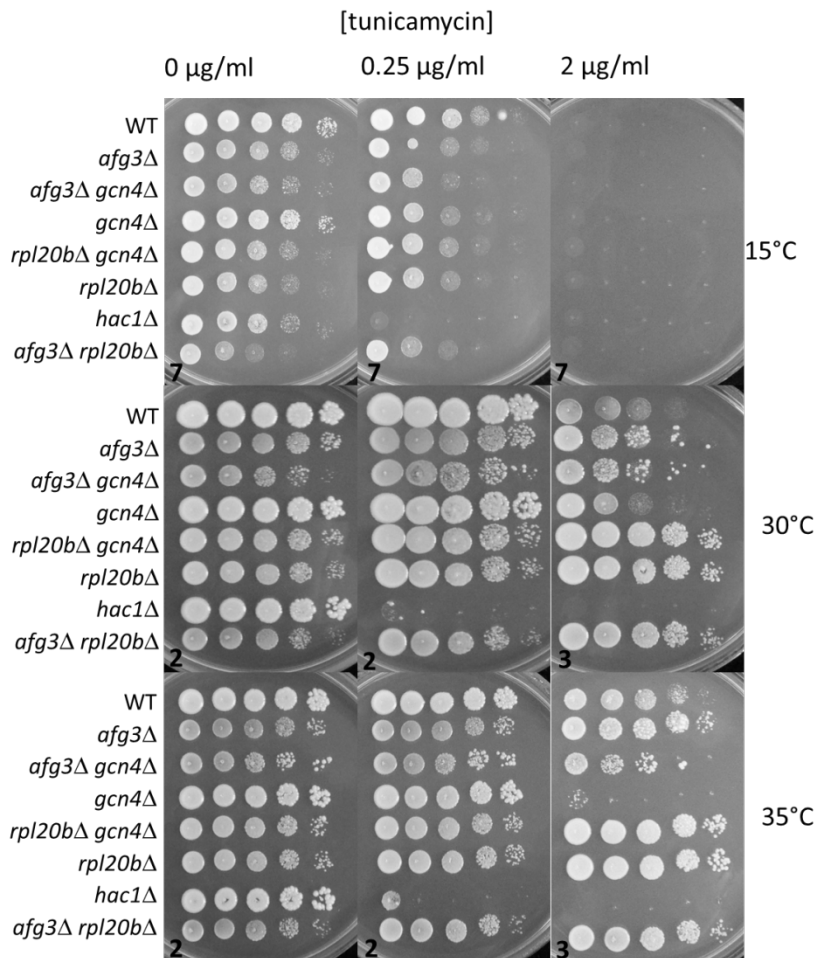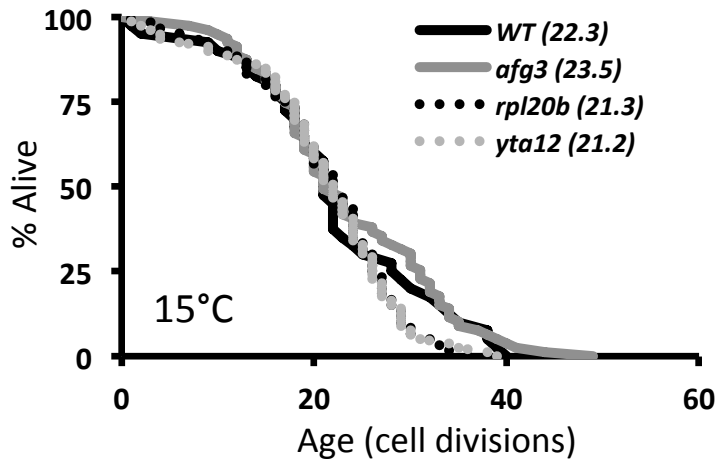

Figure S6

A

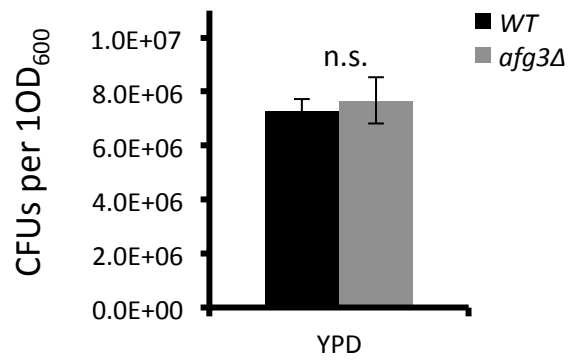

B

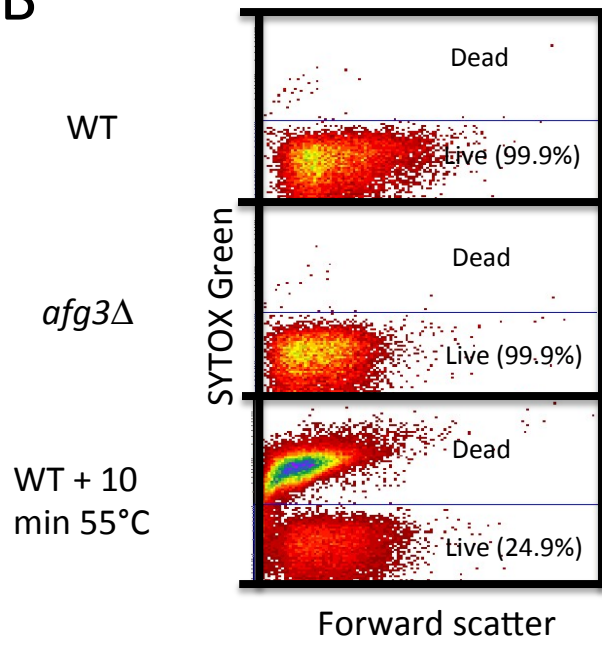



Table S1

| Tunicamycin (1µg/ml) |        |                                    |                                   |                  |        |                |              |                                    |
|----------------------|--------|------------------------------------|-----------------------------------|------------------|--------|----------------|--------------|------------------------------------|
| Strain               | %Δ RLS | Doubling<br>time w/o<br>drug (min) | Doubling<br>time w/<br>drug (min) | GRC <sub>s</sub> | s.e.m. | V <sub>s</sub> | p            | log <sub>2</sub> (V <sub>s</sub> ) |
| BY4742               | N/A    | 96.0                               | 283.7                             | 195.5            | 7.8    | 0.0            | 1.00E+00     | 0.00                               |
| <i>afg3Δ</i>         | 20.4   | 115.0                              | 155.7                             | 35.4             | 0.9    | 81.9           | 3.67E-08 *** | 6.36                               |
| <i>alg12Δ</i>        | 24.7   | 102.8                              | 387.8                             | 277.1            | 11.7   | -41.8          | 6.52E-04 *** | -5.38                              |
| <i>dbp3Δ</i>         | 33.6   | 112.1                              | 187.3                             | 67.1             | 6.2    | 65.7           | 1.65E-06 *** | 6.04                               |
| <i>elp4Δ</i>         | 34.8   | 116.1                              | 254.6                             | 119.4            | 7.7    | 38.9           | 1.13E-03 **  | 5.28                               |
| <i>fob1Δ</i>         | 23.5   | 94.1                               | 298.4                             | 217.2            | 19.5   | -11.1          | 3.27E-01     | -3.48                              |
| <i>gpa2Δ</i>         | 36.1   | 118.4                              | 277.8                             | 134.6            | 12.9   | 31.1           | 7.87E-03 **  | 4.96                               |
| <i>gpr1Δ</i>         | 21.1   | 110.2                              | 265.8                             | 141.3            | 3.5    | 27.7           | 1.41E-02 *   | 4.79                               |
| <i>hse1Δ</i>         | 25.5   | 96.0                               | 477.1                             | 397.3            | 50.3   | -103.2         | 1.38E-07 *** | -6.69                              |
| <i>hxx2Δ</i>         | 25.8   | 103.9                              | 337.3                             | 224.6            | 29.0   | -14.9          | 2.22E-01     | -3.90                              |
| <i>idh1Δ</i>         | 35.1   | 94.1                               | 318.0                             | 237.9            | 26.1   | -21.7          | 7.38E-02     | -4.44                              |
| <i>idh2Δ</i>         | 25.3   | 96.9                               | 283.1                             | 192.2            | 17.2   | 1.7            | 8.81E-01     | 0.74                               |
| <i>inp51Δ</i>        | 13.2   | 114.2                              | 346.0                             | 202.9            | 82.3   | -3.8           | 8.43E-01     | -1.93                              |
| <i>inp53Δ</i>        | 30.7   | 98.4                               | 275.6                             | 180.1            | 14.6   | 7.8            | 4.77E-01     | 2.97                               |
| <i>msw1Δ</i>         | 30.2   | 91.3                               | 287.2                             | 214.5            | 3.9    | -9.7           | 3.64E-01     | -3.28                              |
| <i>mtc4Δ</i>         | 35.5   | 94.5                               | 271.1                             | 187.0            | 16.9   | 4.3            | 6.97E-01     | 2.11                               |
| <i>pkh2Δ</i>         | 22.2   | 96.6                               | 306.4                             | 217.3            | 13.6   | -11.2          | 3.11E-01     | -3.48                              |
| <i>rei1Δ</i>         | 37.5   | 146.2                              | 154.7                             | 5.8              | 5.9    | 97.0           | 1.69E-09 *** | 6.60                               |
| <i>rim1Δ</i>         | 13.7   | 107.7                              | 255.2                             | 137.1            | 11.7   | 29.9           | 1.00E-02 *   | 4.90                               |
| <i>rpl13aΔ</i>       | 27     | 121.0                              | 182.8                             | 51.1             | 8.5    | 73.9           | 2.72E-07 *** | 6.21                               |
| <i>rpl19aΔ</i>       | 28.4   | 124.1                              | 181.0                             | 45.8             | 5.8    | 76.5           | 1.33E-07 *** | 6.26                               |
| <i>rpl20bΔ</i>       | 40.3   | 152.8                              | 185.4                             | 21.3             | 14.5   | 89.1           | 1.46E-08 *** | 6.48                               |
| <i>rpl22aΔ</i>       | 34.5   | 163.2                              | 138.2                             | -15.3            | 8.8    | 107.9          | 2.37E-10 *** | 6.75                               |
| <i>rpl23aΔ</i>       | 29.5   | 115.4                              | 199.0                             | 72.5             | 5.8    | 62.9           | 3.16E-06 *** | 5.98                               |
| <i>rpl34bΔ</i>       | 35.4   | 160.8                              | 223.1                             | 38.7             | 4.2    | 80.2           | 5.58E-08 *** | 6.33                               |
| <i>rpl37bΔ</i>       | 35.1   | 118.9                              | 165.4                             | 39.1             | 7.0    | 80.0           | 6.39E-08 *** | 6.32                               |
| <i>rpl43bΔ</i>       | 37.5   | 100.9                              | 221.3                             | 119.3            | 6.1    | 38.9           | 1.09E-03 **  | 5.28                               |
| <i>rpl6bΔ</i>        | 13.9   | 139.4                              | 190.7                             | 36.8             | 2.9    | 81.2           | 4.37E-08 *** | 6.34                               |
| <i>rpl9aΔ</i>        | 29.4   | 117.7                              | 153.3                             | 30.3             | 9.2    | 84.5           | 2.66E-08 *** | 6.40                               |
| <i>rpp2bΔ</i>        | 54.2   | 147.7                              | 156.6                             | 6.0              | 5.6    | 96.9           | 1.70E-09 *** | 6.60                               |
| <i>sam1Δ</i>         | 37.9   | 99.2                               | 330.5                             | 233.2            | 12.0   | -19.3          | 8.44E-02     | -4.27                              |
| <i>sch9Δ</i>         | 42.8   | 148.8                              | 404.2                             | 171.7            | 23.9   | -12.1          | 2.73E-01     | -3.60                              |
| <i>sip2Δ</i>         | 18     | 91.3                               | 273.2                             | 199.2            | 23.1   | -1.9           | 8.66E-01     | -0.95                              |
| <i>SIR2OX</i>        | 25     | 94.4                               | 301.7                             | 219.6            | 21.3   | -12.3          | 2.84E-01     | -3.62                              |
| <i>sis2Δ</i>         | 47.8   | 92.9                               | 291.3                             | 213.6            | 24.7   | -9.3           | 4.29E-01     | -3.21                              |
| <i>sok1Δ</i>         | 37.2   | 101.1                              | 392.2                             | 288.1            | 30.7   | -47.4          | 5.84E-04 *** | -5.57                              |
| <i>sps1Δ</i>         | 23.8   | 98.8                               | 206.0                             | 108.4            | 25.2   | 44.5           | 7.15E-04 *** | 5.48                               |
| <i>spt4Δ</i>         | 46.3   | 103.1                              | 177.3                             | 72.0             | 6.2    | 63.2           | 3.01E-06 *** | 5.98                               |
| <i>tif1Δ</i>         | 13.1   | 96.5                               | 339.4                             | 251.5            | 73.5   | -28.7          | 1.15E-01     | -4.84                              |
| <i>tif2Δ</i>         | 18.1   | 96.8                               | 295.8                             | 205.6            | 14.9   | -5.2           | 6.38E-01     | -2.37                              |
| <i>tif4631Δ</i>      | 18     | 109.4                              | 243.7                             | 122.7            | 4.2    | 37.2           | 1.61E-03 **  | 5.22                               |
| <i>tis11Δ</i>        | 32.2   | 96.2                               | 302.7                             | 214.7            | 14.4   | -9.8           | 3.74E-01     | -3.30                              |
| <i>tma19Δ</i>        | 31.8   | 92.0                               | 277.1                             | 201.1            | 9.8    | -2.9           | 7.88E-01     | -1.54                              |
| <i>tor1Δ</i>         | 30.8   | 90.6                               | 305.1                             | 236.9            | 18.5   | -21.2          | 6.72E-02     | -4.41                              |
| <i>ubr2Δ</i>         | 47.2   | 96.0                               | 217.1                             | 126.0            | 7.6    | 35.5           | 2.55E-03 **  | 5.15                               |
| <i>ure2Δ</i>         | 29.5   | 93.3                               | 329.7                             | 253.4            | 24.1   | -29.6          | 1.60E-02 *   | -4.89                              |
| <i>ybr238cΔ</i>      | 49.7   | 94.2                               | 310.5                             | 229.8            | 12.2   | -17.6          | 1.15E-01     | -4.13                              |
| BY4743               | 43.8   | 98.1                               | 249.7                             | 154.5            | 8.7    | 21.0           | 5.97E-02     | 4.39                               |
| <i>hac1Δ</i>         | 9.9    | 97.3                               | ng                                | ng               | N/A    | N/A            | N/A          | N/A                                |

ng = no growth in stressed media

GRC<sub>s</sub> = % change in growth rate upon addition of stress, compared to unstressed

V<sub>s</sub> = Stress Vector = (GRC<sub>s</sub> BY4742 - GRC<sub>s</sub> mutant)/(GRC<sub>s</sub> BY4742)\*100

\* p<0.05

\*\* p<0.01

\*\*\* p<0.001 and satisfies Bonferroni correction

Table S2

| Paraquat (5mM)  |        |                                    |                                   |                  |        |                |              |                                    |
|-----------------|--------|------------------------------------|-----------------------------------|------------------|--------|----------------|--------------|------------------------------------|
| Strain          | %Δ RLS | Doubling<br>time w/o<br>drug (min) | Doubling<br>time w/<br>drug (min) | GRC <sub>s</sub> | s.e.m. | V <sub>s</sub> | p            | log <sub>2</sub> (V <sub>s</sub> ) |
| BY4742          | N/A    | 89.2                               | 150.7                             | 68.8             | 3.3    | 0.0            | 1.00E+00     | 0.00                               |
| <i>afg3Δ</i>    | 20.4   | 129.4                              | 164.1                             | 26.9             | 2.9    | 61.0           | 7.43E-06 *** | 5.93                               |
| <i>alg12Δ</i>   | 24.7   | 103.6                              | 157.0                             | 51.6             | 3.5    | 25.1           | 1.79E-02 *   | 4.65                               |
| <i>dbp3Δ</i>    | 33.6   | 115.9                              | 149.5                             | 29.0             | 2.6    | 57.9           | 1.29E-05 *** | 5.86                               |
| <i>elp4Δ</i>    | 34.8   | 128.9                              | 361.3                             | 180.3            | 42.1   | -162.0         | 9.54E-05 *** | -7.34                              |
| <i>job1Δ</i>    | 23.5   | 95.1                               | 150.4                             | 58.2             | 1.7    | 15.4           | 1.15E-01     | 3.95                               |
| <i>gpa2Δ</i>    | 36.1   | 114.9                              | 162.2                             | 41.2             | 1.6    | 40.1           | 5.02E-04 *** | 5.33                               |
| <i>gpr1Δ</i>    | 21.1   | 98.9                               | 181.4                             | 83.5             | 4.7    | -21.2          | 4.50E-02 *   | -4.41                              |
| <i>hse1Δ</i>    | 25.5   | 102.1                              | 153.1                             | 50.0             | 7.0    | 27.4           | 2.96E-02 *   | 4.77                               |
| <i>hvk2Δ</i>    | 25.8   | 99.9                               | 187.7                             | 87.9             | 8.8    | -27.7          | 6.03E-02     | -4.79                              |
| <i>idh1Δ</i>    | 35.1   | 98.7                               | 163.3                             | 65.5             | 11.8   | 4.9            | 7.33E-01     | 2.28                               |
| <i>idh2Δ</i>    | 25.3   | 100.2                              | 150.1                             | 49.8             | 2.3    | 27.7           | 8.94E-03 **  | 4.79                               |
| <i>inp51Δ</i>   | 13.2   | 97.1                               | 192.1                             | 97.7             | 18.3   | -42.0          | 1.80E-02 *   | -5.39                              |
| <i>inp53Δ</i>   | 30.7   | 97.3                               | 143.0                             | 47.0             | 4.4    | 31.7           | 4.73E-03 **  | 4.99                               |
| <i>msw1Δ</i>    | 30.2   | 92.8                               | 166.6                             | 79.6             | 12.4   | -15.6          | 2.40E-01     | -3.96                              |
| <i>mtc4Δ</i>    | 35.5   | 90.4                               | 191.0                             | 111.4            | 0.9    | -61.8          | 3.22E-04 *** | -5.95                              |
| <i>pkh2Δ</i>    | 22.2   | 121.4                              | 168.1                             | 38.5             | 13.6   | 44.0           | 4.55E-03 **  | 5.46                               |
| <i>rei1Δ</i>    | 37.5   | 136.3                              | 164.0                             | 20.3             | 5.7    | 70.5           | 2.84E-06 *** | 6.14                               |
| <i>rim1Δ</i>    | 13.7   | 101.7                              | 169.6                             | 66.8             | 6.2    | 2.9            | 7.77E-01     | 1.55                               |
| <i>rpl13aΔ</i>  | 27     | 121.6                              | 189.8                             | 56.1             | 30.2   | 18.6           | 4.39E-01     | 4.22                               |
| <i>rpl19aΔ</i>  | 28.4   | 119.8                              | 156.5                             | 30.6             | 4.3    | 55.5           | 3.05E-05 *** | 5.79                               |
| <i>rpl20bΔ</i>  | 40.3   | 143.1                              | 182.4                             | 27.4             | 9.3    | 60.2           | 6.78E-05 *** | 5.91                               |
| <i>rpl22aΔ</i>  | 34.5   | 142.1                              | 174.0                             | 22.5             | 4.3    | 67.3           | 3.23E-06 *** | 6.07                               |
| <i>rpl23aΔ</i>  | 29.5   | 121.9                              | 161.5                             | 32.5             | 13.5   | 52.8           | 8.36E-04 *** | 5.72                               |
| <i>rpl34bΔ</i>  | 35.4   | 154.6                              | 209.9                             | 35.7             | 7.8    | 48.1           | 3.78E-04 *** | 5.59                               |
| <i>rpl37bΔ</i>  | 35.1   | 136.9                              | 168.2                             | 22.9             | 4.5    | 66.8           | 3.73E-06 *** | 6.06                               |
| <i>rpl43bΔ</i>  | 37.5   | 102.2                              | 168.8                             | 65.1             | 13.4   | 5.5            | 6.86E-01     | 2.45                               |
| <i>rpl6bΔ</i>   | 13.9   | 125.2                              | 160.8                             | 28.4             | 4.9    | 58.7           | 1.90E-05 *** | 5.87                               |
| <i>rpl9aΔ</i>   | 29.4   | 110.6                              | 156.2                             | 41.3             | 9.0    | 40.1           | 2.52E-03 **  | 5.32                               |
| <i>rpp2bΔ</i>   | 54.2   | 139.1                              | 161.5                             | 16.1             | 3.4    | 76.6           | 4.93E-07 *** | 6.26                               |
| <i>sam1Δ</i>    | 37.9   | 90.4                               | 159.1                             | 76.0             | 10.4   | -10.4          | 3.93E-01     | -3.38                              |
| <i>sch9Δ</i>    | 42.8   | 178.8                              | 250.6                             | 40.2             | 3.8    | 41.7           | 4.85E-04 *** | 5.38                               |
| <i>sip2Δ</i>    | 18     | 88.0                               | 162.5                             | 84.6             | 8.3    | -22.9          | 5.16E-02     | -4.52                              |
| <i>SIR2OX</i>   | 25     | 87.1                               | 158.4                             | 81.9             | 9.5    | -18.9          | 1.17E-01     | -4.24                              |
| <i>sis2Δ</i>    | 47.8   | 104.8                              | 214.9                             | 105.1            | 14.8   | -52.6          | 1.67E-03 **  | -5.72                              |
| <i>sok1Δ</i>    | 37.2   | 88.0                               | 149.6                             | 70.0             | 9.7    | -1.7           | 8.91E-01     | -0.74                              |
| <i>sps1Δ</i>    | 23.8   | 94.3                               | 140.6                             | 49.1             | 4.2    | 28.7           | 1.86E-02 *   | 4.85                               |
| <i>spt4Δ</i>    | 46.3   | 111.0                              | 292.1                             | 163.2            | 26.8   | -137.0         | 7.85E-06 *** | -7.10                              |
| <i>tif1Δ</i>    | 13.1   | 94.2                               | 151.9                             | 61.2             | 4.8    | 11.1           | 2.72E-01     | 3.47                               |
| <i>tif2Δ</i>    | 18.1   | 95.1                               | 159.2                             | 67.4             | 4.4    | 2.1            | 8.30E-01     | 1.08                               |
| <i>tif4631Δ</i> | 18     | 111.0                              | 204.3                             | 84.0             | 24.4   | -22.1          | 2.79E-01     | -4.46                              |
| <i>tis11Δ</i>   | 32.2   | 91.0                               | 156.4                             | 71.9             | 14.0   | -4.4           | 7.48E-01     | -2.15                              |
| <i>tma19Δ</i>   | 31.8   | 91.6                               | 161.9                             | 76.7             | 15.8   | -11.5          | 4.41E-01     | -3.52                              |
| <i>tor1Δ</i>    | 30.8   | 99.2                               | 152.0                             | 53.3             | 7.8    | 22.6           | 5.11E-02     | 4.50                               |
| <i>ubr2Δ</i>    | 47.2   | 91.0                               | 199.1                             | 118.9            | 4.0    | -72.6          | 7.61E-05 *** | -6.18                              |
| <i>ure2Δ</i>    | 29.5   | 99.1                               | 142.8                             | 44.1             | 4.8    | 36.0           | 2.06E-03 **  | 5.17                               |
| <i>ybr238cΔ</i> | 49.7   | 90.2                               | 156.7                             | 73.7             | 8.5    | -7.1           | 5.31E-01     | -2.82                              |
| BY4743          | 43.8   | 88.9                               | 193.7                             | 118.0            | 11.5   | -71.4          | 1.52E-04 *** | -6.16                              |
| <i>ctt1Δ</i>    | -5.3   | 80.9                               | 158.0                             | 95.3             | 12.6   | -38.5          | 1.07E-02 *   | -5.27                              |
| <i>cta1Δ</i>    | 2.5    | 90.0                               | 182.1                             | 102.2            | 13.6   | -48.5          | 3.15E-03 **  | -5.60                              |
| <i>sod1Δ</i>    | -83.8  | 87.1                               | ng                                | ng               | N/A    | N/A            | N/A          | N/A                                |

ng = no growth in stressed media

GRC<sub>s</sub> = % change in growth rate upon addition of stress, compared to unstressed

V<sub>s</sub> = Stress Vector = (GRC<sub>s</sub> BY4742 - GRC<sub>s</sub> mutant)/(GRC<sub>s</sub> BY4742)\*100

\* p<0.05

\*\* p<0.01

\*\*\* p<0.001 and satisfies Bonferroni correction

Table S3

| MMS (0.01%)     |        |                                    |                                   |                  |        |                |              |                                    |
|-----------------|--------|------------------------------------|-----------------------------------|------------------|--------|----------------|--------------|------------------------------------|
| Strain          | %Δ RLS | Doubling<br>time w/o<br>drug (min) | Doubling<br>time w/<br>drug (min) | GRC <sub>s</sub> | s.e.m. | V <sub>s</sub> | p            | log <sub>2</sub> (V <sub>s</sub> ) |
| BY4742          | N/A    | 90.8                               | 150.6                             | 66.0             | 3.6    | 0.0            | 1.00E+00     | 0.00                               |
| <i>afg3Δ</i>    | 20.4   | 117.8                              | 254.9                             | 116.4            | 9.2    | -76.4          | 1.04E-08 *** | -6.26                              |
| <i>alg12Δ</i>   | 24.7   | 95.8                               | 148.5                             | 54.9             | 2.5    | 16.7           | 2.59E-02 *   | 4.07                               |
| <i>dbp3Δ</i>    | 33.6   | 115.1                              | 180.4                             | 56.7             | 11.7   | 14.1           | 1.63E-01     | 3.82                               |
| <i>elp4Δ</i>    | 34.8   | 111.9                              | 254.8                             | 127.6            | 13.4   | -93.4          | 6.99E-09 *** | -6.55                              |
| <i>fob1Δ</i>    | 23.5   | 89.0                               | 134.7                             | 51.4             | 3.3    | 22.1           | 5.14E-03 **  | 4.47                               |
| <i>gpa2Δ</i>    | 36.1   | 119.8                              | 197.1                             | 64.5             | 12.7   | 2.2            | 8.32E-01     | 1.13                               |
| <i>gpr1Δ</i>    | 21.1   | 93.7                               | 151.6                             | 61.8             | 4.4    | 6.2            | 4.05E-01     | 2.64                               |
| <i>hse1Δ</i>    | 25.5   | 91.2                               | 145.0                             | 59.1             | 3.4    | 10.5           | 1.58E-01     | 3.39                               |
| <i>hxx2Δ</i>    | 25.8   | 96.0                               | 151.6                             | 58.0             | 1.2    | 12.1           | 9.35E-02     | 3.59                               |
| <i>idh1Δ</i>    | 35.1   | 95.6                               | 156.1                             | 63.3             | 6.2    | 4.0            | 6.15E-01     | 2.00                               |
| <i>idh2Δ</i>    | 25.3   | 95.7                               | 163.7                             | 70.9             | 7.4    | -7.6           | 3.65E-01     | -2.92                              |
| <i>inp51Δ</i>   | 13.2   | 91.6                               | 144.8                             | 58.1             | 2.9    | 11.9           | 1.05E-01     | 3.58                               |
| <i>inp53Δ</i>   | 30.7   | 97.1                               | 145.0                             | 49.3             | 2.4    | 25.2           | 1.55E-03 **  | 4.66                               |
| <i>msw1Δ</i>    | 30.2   | 91.1                               | 134.3                             | 47.3             | 2.2    | 28.3           | 5.12E-04 *** | 4.82                               |
| <i>mtc4Δ</i>    | 35.5   | 88.6                               | 135.1                             | 52.4             | 4.9    | 20.5           | 1.15E-02 *   | 4.36                               |
| <i>pkh2Δ</i>    | 22.2   | 94.2                               | 148.1                             | 57.1             | 4.2    | 13.4           | 8.04E-02     | 3.74                               |
| <i>rei1Δ</i>    | 37.5   | 138.2                              | 222.5                             | 61.0             | 13.7   | 7.5            | 4.91E-01     | 2.90                               |
| <i>rim1Δ</i>    | 13.7   | 95.2                               | 151.2                             | 58.8             | 9.8    | 10.8           | 2.42E-01     | 3.44                               |
| <i>rpl13aΔ</i>  | 27     | 115.1                              | 178.3                             | 54.9             | 10.2   | 16.7           | 8.10E-02     | 4.06                               |
| <i>rpl19aΔ</i>  | 28.4   | 118.3                              | 189.9                             | 60.5             | 12.0   | 8.3            | 4.10E-01     | 3.06                               |
| <i>rpl20bΔ</i>  | 40.3   | 154.3                              | 274.1                             | 77.7             | 24.7   | -17.8          | 2.86E-01     | -4.15                              |
| <i>rpl22aΔ</i>  | 34.5   | 150.1                              | 266.1                             | 77.3             | 19.8   | -17.2          | 2.21E-01     | -4.11                              |
| <i>rpl23aΔ</i>  | 29.5   | 116.7                              | 185.6                             | 59.0             | 9.6    | 10.6           | 2.49E-01     | 3.41                               |
| <i>rpl34bΔ</i>  | 35.4   | 191.5                              | 404.7                             | 111.3            | 42.5   | -68.8          | 1.55E-02 *   | -6.10                              |
| <i>rpl37bΔ</i>  | 35.1   | 116.8                              | 168.9                             | 44.6             | 8.5    | 32.3           | 9.48E-04 *** | 5.02                               |
| <i>rpl43bΔ</i>  | 37.5   | 100.2                              | 153.9                             | 53.6             | 2.9    | 18.8           | 1.41E-02 *   | 4.23                               |
| <i>rpl6bΔ</i>   | 13.9   | 130.7                              | 215.8                             | 65.1             | 14.8   | 1.3            | 9.10E-01     | 0.35                               |
| <i>rpl9aΔ</i>   | 29.4   | 115.3                              | 183.9                             | 59.5             | 10.9   | 9.9            | 3.08E-01     | 3.30                               |
| <i>rpp2bΔ</i>   | 54.2   | 143.3                              | 252.9                             | 76.4             | 19.9   | -15.9          | 2.59E-01     | -3.99                              |
| <i>sam1Δ</i>    | 37.9   | 95.5                               | 150.4                             | 57.5             | 2.7    | 12.9           | 8.09E-02     | 3.69                               |
| <i>sch9Δ</i>    | 42.8   | 149.4                              | 417.4                             | 179.4            | 17.4   | -172.0         | 1.30E-12 *** | -7.43                              |
| <i>sip2Δ</i>    | 18     | 93.8                               | 149.0                             | 58.9             | 6.4    | 10.8           | 1.85E-01     | 3.43                               |
| <i>SIR2OX</i>   | 25     | 91.5                               | 144.1                             | 57.5             | 9.6    | 12.8           | 1.66E-01     | 3.68                               |
| <i>sis2Δ</i>    | 47.8   | 100.4                              | 165.7                             | 65.0             | 9.3    | 1.4            | 8.73E-01     | 0.51                               |
| <i>sok1Δ</i>    | 37.2   | 99.0                               | 147.9                             | 49.5             | 10.5   | 25.0           | 1.32E-02 *   | 4.64                               |
| <i>sps1Δ</i>    | 23.8   | 109.3                              | 168.1                             | 53.8             | 7.5    | 18.5           | 3.45E-02 *   | 4.21                               |
| <i>spt4Δ</i>    | 46.3   | 105.0                              | 191.0                             | 81.9             | 3.2    | -24.2          | 2.47E-03 **  | -4.60                              |
| <i>tif1Δ</i>    | 13.1   | 97.7                               | 157.0                             | 60.7             | 10.0   | 8.0            | 3.91E-01     | 2.99                               |
| <i>tif2Δ</i>    | 18.1   | 94.5                               | 137.3                             | 45.3             | 0.8    | 31.3           | 1.44E-04 *** | 4.97                               |
| <i>tif4631Δ</i> | 18     | 117.3                              | 172.2                             | 46.8             | 11.3   | 29.1           | 6.19E-03 **  | 4.86                               |
| <i>tis11Δ</i>   | 32.2   | 101.4                              | 150.3                             | 48.2             | 6.1    | 27.0           | 2.06E-03 **  | 4.75                               |
| <i>tma19Δ</i>   | 31.8   | 94.5                               | 145.2                             | 53.7             | 8.3    | 18.6           | 3.92E-02 *   | 4.21                               |
| <i>tor1Δ</i>    | 30.8   | 87.7                               | 131.7                             | 50.1             | 2.8    | 24.0           | 2.50E-03 **  | 4.58                               |
| <i>ubr2Δ</i>    | 47.2   | 94.9                               | 145.0                             | 52.8             | 2.9    | 20.0           | 9.64E-03 **  | 4.32                               |
| <i>ure2Δ</i>    | 29.5   | 95.4                               | 148.3                             | 55.5             | 7.6    | 15.8           | 6.75E-02     | 3.98                               |
| <i>ybr238cΔ</i> | 49.7   | 100.3                              | 155.1                             | 54.7             | 4.9    | 17.1           | 3.17E-02 *   | 4.09                               |
| BY4743          | 43.8   | 88.8                               | 135.2                             | 52.3             | 3.2    | 20.7           | 8.06E-03 **  | 4.37                               |
| <i>rad52Δ</i>   | -55.4  | 107.2                              | 650.1                             | 506.5            | 166.5  | -667.9         | 7.85E-07 *** | -9.38                              |

ng = no growth in stressed media

GRC<sub>s</sub> = % change in growth rate upon addition of stress, compared to unstressed

V<sub>s</sub> = Stress Vector = (GRC<sub>s</sub> BY4742 - GRC<sub>s</sub> mutant) / (GRC<sub>s</sub> BY4742) \* 100

\* p < 0.05

\*\* p < 0.01

\*\*\* p < 0.001 and satisfies Bonferroni correction

Table S4

| Heat Shock (10 min 55°C) |        |                                  |        |              |                             |
|--------------------------|--------|----------------------------------|--------|--------------|-----------------------------|
| Strain                   | %Δ RLS | Vs WT<br>(16% alive<br>baseline) | s.e.m. | p            | log <sub>2</sub> (Vs<br>WT) |
| BY4742                   | N/A    | 0.0                              | 4.2    | 1.00E+00     | 0.00                        |
| <i>afg3Δ</i>             | 20.4   | 101.0                            | 55.2   | 7.11E-04 *** | 6.66                        |
| <i>alg12Δ</i>            | 24.7   | 12.0                             | 5.9    | 5.77E-01     | 2.55                        |
| <i>dbp3Δ</i>             | 33.6   | 107.3                            | 52.9   | 2.77E-04 *** | 6.74                        |
| <i>elp4Δ</i>             | 34.8   | 49.7                             | 46.7   | 3.47E-02 *   | 5.63                        |
| <i>fob1Δ</i>             | 23.5   | -19.0                            | 11.2   | 7.68E-02     | -4.25                       |
| <i>gpa2Δ</i>             | 36.1   | 86.9                             | 33.1   | 1.01E-04 *** | 6.44                        |
| <i>gpr1Δ</i>             | 21.1   | -44.4                            | 11.8   | 2.06E-04 *** | -5.47                       |
| <i>hse1Δ</i>             | 25.5   | -4.8                             | 11.8   | 6.33E-01     | -2.26                       |
| <i>hxx2Δ</i>             | 25.8   | -10.0                            | 13.1   | 3.42E-01     | -3.33                       |
| <i>idh1Δ</i>             | 35.1   | 4.3                              | 9.1    | 6.43E-01     | 2.11                        |
| <i>idh2Δ</i>             | 25.3   | 33.2                             | 20.4   | 1.75E-02 *   | 5.05                        |
| <i>inp51Δ</i>            | 13.2   | 6.5                              | 12.8   | 5.32E-01     | 2.70                        |
| <i>inp53Δ</i>            | 30.7   | 4.9                              | 12.3   | 6.29E-01     | 2.30                        |
| <i>msw1Δ</i>             | 30.2   | 12.0                             | 7.6    | 1.88E-01     | 3.59                        |
| <i>mtc4Δ</i>             | 35.5   | 28.8                             | 6.7    | 3.22E-03 **  | 4.85                        |
| <i>pkh2Δ</i>             | 22.2   | 21.4                             | 8.9    | 2.90E-02 *   | 4.42                        |
| <i>rei1Δ</i>             | 37.5   | 141.8                            | 127.8  | 3.67E-02 *   | 7.15                        |
| <i>rim1Δ</i>             | 13.7   | -43.8                            | 14.7   | 5.70E-04 *** | -5.45                       |
| <i>rpl13aΔ</i>           | 27     | 84.2                             | 45.6   | 8.52E-04 *** | 6.39                        |
| <i>rpl19aΔ</i>           | 28.4   | 78.4                             | 59.3   | 8.62E-03 **  | 6.29                        |
| <i>rpl20bΔ</i>           | 40.3   | 233.8                            | 260.2  | 4.94E-02 *   | 7.87                        |
| <i>rpl22aΔ</i>           | 34.5   | 227.1                            | 217.5  | 2.48E-02 *   | 7.83                        |
| <i>rpl23aΔ</i>           | 29.5   | 45.9                             | 31.7   | 1.62E-02 *   | 5.52                        |
| <i>rpl34bΔ</i>           | 35.4   | 386.3                            | 317.5  | 1.02E-02 *   | 8.59                        |
| <i>rpl37bΔ</i>           | 35.1   | 44.8                             | 40.8   | 5.09E-02     | 5.49                        |
| <i>rpl43b</i>            | 37.5   | -20.8                            | 16.0   | 8.04E-02     | -4.38                       |
| <i>rpl6bΔ</i>            | 13.9   | -33.6                            | 7.8    | 5.58E-03 **  | -5.07                       |
| <i>rpl9aΔ</i>            | 29.4   | 27.1                             | 11.4   | 2.49E-02 *   | 4.76                        |
| <i>rpp2bΔ</i>            | 54.2   | 43.2                             | 19.5   | 2.52E-03 **  | 5.43                        |
| <i>sam1Δ</i>             | 37.9   | 3.1                              | 14.7   | 7.81E-01     | 1.63                        |
| <i>sch9Δ</i>             | 42.8   | 60.2                             | 5.1    | 4.58E-07 *** | 5.91                        |
| <i>sip2Δ</i>             | 18     | 8.1                              | 7.1    | 3.63E-01     | 3.03                        |
| <i>SIR2OX</i>            | 25     | -2.0                             | 9.0    | 8.25E-01     | -1.03                       |
| <i>sis2Δ</i>             | 47.8   | 20.1                             | 7.1    | 3.23E-02 *   | 4.33                        |
| <i>sok1Δ</i>             | 37.2   | 23.3                             | 7.9    | 1.62E-02 *   | 4.54                        |
| <i>sps1Δ</i>             | 23.8   | 15.6                             | 36.2   | 4.33E-01     | 3.97                        |
| <i>spt4Δ</i>             | 46.3   | 92.5                             | 80.5   | 3.30E-02 *   | 6.53                        |
| <i>tif1Δ</i>             | 13.1   | 10.5                             | 8.2    | 2.57E-01     | 3.39                        |
| <i>tif2Δ</i>             | 18.1   | -6.6                             | 6.0    | 4.90E-01     | -2.71                       |
| <i>tif4631Δ</i>          | 18     | -3.1                             | 32.5   | 8.55E-01     | -1.62                       |
| <i>tis11Δ</i>            | 32.2   | 11.5                             | 6.3    | 2.36E-01     | 3.52                        |
| <i>tma19Δ</i>            | 31.8   | 12.0                             | 2.3    | 2.00E-01     | 3.58                        |
| <i>tor1Δ</i>             | 30.8   | -28.2                            | 9.2    | 9.38E-03 **  | -4.82                       |
| <i>ubr2Δ</i>             | 47.2   | 62.9                             | 12.0   | 2.89E-06 *** | 5.98                        |
| <i>ure2Δ</i>             | 29.5   | -20.5                            | 14.0   | 6.55E-02     | -4.36                       |
| <i>ybr238cΔ</i>          | 49.7   | 67.3                             | 21.1   | 4.46E-05 *** | 6.07                        |
| BY4743                   | 43.8   | -30.2                            | 8.1    | 5.19E-03 **  | -4.92                       |
| <i>hac1Δ</i>             | 9.9    | -72.7                            | 22.6   | 3.01E-05 *** | -6.18                       |
| <i>msn2 msn4Δ</i>        | 11.8   | -73.2                            | 25.5   | 7.46E-05 *** | -6.19                       |

ng = no growth in stressed media

Vs WT = % change in survival integral  
(WT survival on average 16%)

\* p<0.05

\*\* p<0.01

\*\*\* p<0.001 and satisfies Bonferroni correction

**Table S5: Strains used in this study**

| <u>Genotype</u> | <u>Frozen stock</u> | <u>Full Genotype (all MATalpha)</u>                        |
|-----------------|---------------------|------------------------------------------------------------|
| WT              | GS2422              | BY4742 his3 leu2 ura3 MET15 lys2                           |
| sir2 fob1       | KK144               | sir2::HIS3 fob1::LEU2 his3 leu2 ura3 MET15 lys2            |
| gcn4            | JD364               | gcn4::KanMX his3 leu2 ura3 met15 LYS2                      |
| fob1            | GS11                | fob1::URA3 his3 leu2 ura3 MET15 lys2                       |
| tor1            | GS5                 | tor1::URA3 his3 leu2 ura3 MET15 lys2                       |
| rpl20b          | JD288/KS1797        | rpl20b::HIS3 his3 leu2 ura3 MET15 lys2                     |
| SIR2OX          | JD570               | SIR2OX::LEU2 his3 leu2 ura3 MET15 lys2                     |
| afg3            | JD487               | afg3::URA3 his3 leu2 ura3 MET15 lys2                       |
| sir2 fob1 afg3  | JD385               | afg3::URA3 sir2::HIS3 fob1::LEU2 his3 leu2 ura3 MET15 lys2 |
| afg3 gcn4       | JD604               | afg3::URA3 gcn4::KanMX his3 leu2 ura3 MET15 LYS2           |
| afg3 hac1       | JD594               | afg3::URA3 hac1::KanMX his3 leu2 ura3 MET15 lys2           |
| rpl20b hac1     | KS542               | rpl20b::HIS3 hac1::KanMX his3 leu2 ura3 met15 LYS2         |
| mrpl32          | JD669               | mrpl32::URA3 his3 leu2 ura3 MET15 lys2                     |
| yta12           | JD822               | yta12::URA3 his3 leu2 ura3 MET15 lys2                      |
| afg3 rpl20b     | JD1666              | rpl20b::HIS3 afg3::URA3 his3 leu2 ura3 MET15 lys2          |
| rho0            | JD569               | rho0 his3 leu2 ura3 MET15 lys2                             |

All others are from the BY4742 deletion collection

**Table S6: Supplemental life span data**

| Figure | Strain              | Mean        | Median | N   | p val<br>vs strain 1 | p val<br>vs strain 2 | p val<br>vs strain 3 |
|--------|---------------------|-------------|--------|-----|----------------------|----------------------|----------------------|
| 5b     | 1 WT                | <b>23.2</b> | 24     | 40  |                      |                      |                      |
|        | 2 afg3              | <b>28.4</b> | 28     | 160 | 2.04E-03             |                      |                      |
|        | 3 hac1              | <b>25.6</b> | 26     | 20  | 3.22E-01             | 2.15E-01             |                      |
|        | 4 afg3 hac1         | <b>30.7</b> | 32     | 40  | 2.08E-04             | 1.16E-01             | 3.49E-02             |
| 6c     | 1 fob1              | <b>32.7</b> | 35     | 39  |                      |                      |                      |
|        | 2 fob1 afg3         | <b>38.3</b> | 40     | 40  | 2.29E-02             |                      |                      |
| 6d     | 1 WT                | <b>20.3</b> | 19     | 80  |                      |                      |                      |
|        | 2 afg3              | <b>25.5</b> | 24     | 180 | 1.15E-03             |                      |                      |
|        | 3 sir2 fob1         | <b>19.7</b> | 20     | 40  | 9.29E-01             | 1.25E-02             |                      |
|        | 4 sir2 fob1 afg3    | <b>29.1</b> | 30     | 40  | 1.43E-06             | 1.42E-02             | 2.96E-05             |
| 6e     | 1 sir2 fob1         | <b>30.8</b> | 34     | 20  |                      |                      |                      |
|        | 2 sir2 fob1 afg3    | <b>46.0</b> | 44     | 20  | 3.60E-02             |                      |                      |
|        | 3 sir2 fob1 DR      | <b>42.9</b> | 50     | 20  | 1.67E-02             | 9.14E-01             |                      |
|        | 4 sir2 fob1 afg3 DR | <b>45.4</b> | 48     | 20  | 1.48E-03             | <b>8.82E-01</b>      | 7.56E-01             |
| 6f     | 1 WT                | <b>21.2</b> | 20     | 98  |                      |                      |                      |
|        | 2 afg3              | <b>26.7</b> | 26     | 260 | 2.95E-07             |                      |                      |
|        | 3 gcn4              | <b>22.7</b> | 21     | 80  | 2.24E-01             | 8.08E-04             |                      |
|        | 4 afg3 gcn4         | <b>18.0</b> | 17     | 119 | 4.10E-03             | 7.59E-13             | 4.82E-04             |
| 6h     | 1 WT                | <b>19.8</b> | 19     | 39  |                      |                      |                      |
|        | 2 afg3              | <b>24.2</b> | 24     | 100 | 4.77E-03             |                      |                      |
|        | 3 rpl20b            | <b>33.8</b> | 36     | 59  | 1.41E-08             | 4.34E-08             |                      |
|        | 4 afg3 rpl20b       | <b>30.3</b> | 32     | 40  | 2.23E-05             | 1.70E-03             | <b>1.24E-01</b>      |
| S1     | 1 WT                | <b>23.3</b> | 22     | 125 |                      |                      |                      |
|        | 2 sod1              | <b>3.8</b>  | 3      | 76  | 6.71E-32             |                      |                      |
| S1     | 1 WT                | <b>26.3</b> | 25     | 45  |                      |                      |                      |
|        | 2 ctt1              | <b>24.9</b> | 24     | 43  | 6.64E-01             |                      |                      |
| S1     | 1 WT                | <b>28.3</b> | 29     | 55  |                      |                      |                      |
|        | 2 cta1              | <b>29.0</b> | 27     | 45  | 7.68E-01             |                      |                      |
| S1     | 1 WT                | <b>26.2</b> | 26     | 600 |                      |                      |                      |
|        | 2 msn2 msn4         | <b>29.3</b> | 30     | 623 | 1.76E-08             |                      |                      |
| S1     | 1 WT                | <b>26.5</b> | 26     | 545 |                      |                      |                      |
|        | 2 hac1              | <b>29.1</b> | 29     | 543 | 6.77E-06             |                      |                      |
| S1     | 1 WT                | <b>24.2</b> | 23     | 150 |                      |                      |                      |
|        | 2 rad52             | <b>10.8</b> | 10     | 130 | 2.20E-30             |                      |                      |
| S2     | 1 WT                | <b>26.3</b> | 26     | 425 |                      |                      |                      |
|        | 2 idh1              | <b>32.8</b> | 33     | 304 | 1.66E-14             |                      |                      |
| S2     | 1 WT                | <b>26.6</b> | 26     | 764 |                      |                      |                      |
|        | 2 idh2              | <b>30.7</b> | 31     | 595 | 4.10E-11             |                      |                      |
| S2     | 1 WT                | <b>25.2</b> | 23     | 35  |                      |                      |                      |
|        | 2 atp5              | <b>27.3</b> | 27     | 55  | 4.22E-01             |                      |                      |
| S2     | 1 WT                | <b>25.3</b> | 21     | 15  |                      |                      |                      |
|        | 2 coq5              | <b>14.3</b> | 15     | 15  | 8.41E-04             |                      |                      |
| S4b    | 1 WT                | <b>23.7</b> | 23     | 80  |                      |                      |                      |
|        | 2 mrpl32            | <b>28.2</b> | 28     | 60  | 6.82E-03             |                      |                      |
| S4b    | 1 WT                | <b>25.8</b> | 24     | 60  |                      |                      |                      |
|        | 2 yta12             | <b>20.0</b> | 20     | 53  | 5.45E-03             |                      |                      |
| S4b    | 1 WT                | <b>26.7</b> | 26     | 160 |                      |                      |                      |
|        | 2 rho0              | <b>26.1</b> | 26     | 110 | 9.41E-01             |                      |                      |
|        | 3 afg3              | <b>30.7</b> | 31     | 20  | 3.71E-02             | 5.25E-02             |                      |
|        | 4 afg3 rho0         | <b>30.3</b> | 32     | 40  | 3.00E-02             | 7.74E-02             | 9.94E-01             |
| S4d    | 1 W303              | <b>18.8</b> | 20     | 40  |                      |                      |                      |
|        | 2 W303 afg3         | <b>19.6</b> | 21     | 80  | 6.87E-01             |                      |                      |
| S5     | 1 WT                | <b>22.3</b> | 21     | 40  |                      |                      |                      |
|        | 2 afg3              | <b>23.5</b> | 21     | 79  | 7.21E-01             |                      |                      |
|        | 3 rpl20b            | <b>21.3</b> | 22     | 60  | 8.66E-01             |                      |                      |
|        | 4 yta12             | <b>21.2</b> | 22     | 79  | 8.51E-01             |                      |                      |
